# Supplementary material for: The burden of neural tube defects in Southern Ethiopia: trends, hotspots, and public health implications
Source: PeerJ. 2026 Feb 17;14:e20447. doi: 10.7717/peerj.20447 (PMC12922585; doi:10.7717/peerj.20447)
Supplement: Supplemental Information 4 [file peerj-14-20447-s004.xlsx]

## Sheet: Supplementary file 1. SPSS raw 
Recordid	MRNofmother	region	woreda	kebele	town	hospitalname	dateofbirth	yrbirth	maternalageinyr	residence	modeofdelivery	Spemoddeliverypro	maternalstatus	obstetricompl	obestrconditns	Polyhydram	gestatageatbirthwks	birthWtingrs	apgars1min	apgars5min	birthoutcome	typesofstillbirth	sexofnewborn	typesofinterventiondoneforAliveneonateswithNTDs	nbproblemIdentified	newbornproblems	newborndelivery	typeofpregnancy	neonatalageatbirth	typentdsdiag	typesofspinab	Othcongeandx	specifyotherNTDs	hpdiagnntds	spHPdiagntds	birthmanagedby	specifybirthmanagedby	TimeofNTDsDiagnosis	ntdsdiagconbyUSound	wksgaNTDdiagUltraSound	postNTDsFAtab	PostNTdsbirthorterminationFAorderedbyHCWs	SpecifypostNTdsbirthtermmedicalcaredeliveredformothers	P2SpecifyanyothermedicationorderedorgivenPostNTDsbirthorterminat	Formsofcaredelivered	ANCfollowup	placeforANCvisits	ultrasoundExuse	PlacUltrasExam
1	2112410	3	Damot Gale	arada	boditi	11	30510	2	35	2	1	normal svd	1	3	no	0	37	2500	0	0	2	3	1		5	5	1	0	2	2		6		2		2		2	2	0	1	1			3	1	2	1	1
2	484109	3	Boloso sore	none	none	11	241009	1	27	1	1	normal svd	1	6	no	0	38	2000	0	0	2	3	2		5	5	1	0	2	3		6		4		4		2	2	0	4	2			3	1	2	2
3	5270713	3	Damot gale	none	none	11	80114	5	18	1	4	Episiotomy	1	6	no	0	41.5	4000	0	0	2	2	1		5	5	1	0	2	1	4	1		1		1		2	2	0	2	1			3	1	2	1	1
4	4577609	3	Sodo town	6	sodo	11	21109	1	20	2	2	CS	2	6	no	0	38	1200	0	0	2	1	2		2	25	1	0	2	2		6		2		2		2	2	0	1	1			3	1	2	1	1
5	2188612	3	Damote sore	D/H	no	11	100512	4	35	1	1	normal svd	1	8	PROM	0	34	1200	0	0	2	3	1		5	5	1	0	1	3	4	6		2		2		1	1	31.2	3	2		Iron-sulphate 325 mg podiclofenac	3	1	4	1	1
6	1061214	3	Sodo zuria	G/bisare	no	11	80314	5	20	1	1	normal svd	1	6	no	0	33.4	3000	0	0	2	3	1		5	1	1	0	1	1	4	1		2		2		1	1	31.6	2	1			3	1	2	1	1
7	3152510	3	Sodo town	ottona	sodo	11	170710	2	36	2	1	normal svd	1	6	no	0	37	3000	0	0	2	3	1		5	5	1	0	2	1	3	6		2		2		2	2	0	2	1			3	1	2	1	1
8	1161912	3	Sodo zuria	Offa	no	11	60312	3	22	1	1	normal svd	1	6	no	0	39	2000	0	0	2	2	1		5	5	1	0	2	2		6		2		2		2	2	0	4	2			3	1	2	2
9	446913	3	Sodo town	1	sodo	11	100213	4	30	2	1	normal svd	1	6	no	0	26.2	1200	0	0	2	3	1		5	6	1	0	1	2		6		6	Resident+midwife	5	Resident+Midwife	1	1	26.2	2	1			3	1	2	1	1
10	2451210	3	Boditi	no	Boditi	11	100510	2	22	1	1	normal svd	1	6	no	0	28	1200	6	7	1		1	1	1	1	1	0	1	1	3	1		6	Resident	5	Resident	2	2	0	1	1			3	1	2	1	1
11	1493110	3	Sodo town	3	sodo	11	80410	1	18	2	1	normal svd	1	6	no	0	40	3200	6	7	1		1	1	5	5	1	0	2	2		6		4		4		2	2	0	2	1		ceftriaxone 1gm iv	5	2		2
12	1372410	3	Silti	dabosobola	no	4	150214	5	22	1	1	normal svd	1	6	no	0	36	1800	2	0	2	2	2		1	15	1	0	1	1	4	1		6	IESO+midwife	5	IESO+Midwife	2	2	0	4	2			1	1	1	1	1
13	685114	3	Meskan	ocha geneme	no	4	80414	5	30	1	1	normal svd	1	6	no	0	40	1500	0	0	2	3	2		2	25	1	0	2	3	4	1		3		3		2	2	0	4	2			3	1	2	2
14	739214	3	Meskan	deda	no	4	160414	5	37	1	1	Assisted breech delivery	1	7	Polyhydraminous	1	36.6	1000	0	0	2	2	2		2	25	2	2	2	1	3	6		3		3		2	2	0	4	2			5	2		2
15	1783813	3	Soddo woreda	1	Buee	4	81013	5	25	2	1	normal svd	1	6	no	0	38.1	3500	8	10	1		2	2	2	5	1	0	2	1	1	2		5		3		1	1	37	4	2			3	2		1	3
16	1276904	3	Meskan	Erimzaf,04	Butajira	4	271013	5	25	2	2	CS	1	6	no	0	36.4	3200	8	9	1		2	1	5	5	1	0	1	1	2	1		1		1		1	1	36	4	2	psychological support	Caftriaxone 1gm IV BID,Tramadole 50MG IV TID	1	1	1	1	3
17	665613	3	Meskan	debnagola	no	4	70513	5	30	1	1	Assisted breech delivery	1	6	no	0	28	3600	4	0	2	3	2	3	2	245	1	0	1	1	4	1		3		3		2	2	0	2	1			5	3		2
18	680412	3	Meskan	2	Butajira	4	210312	3	37	2	2	CS	1	6	no	0	33	2700	6	8	1		1	1	5	45	1	0	1	1	4	6		4		4		2	2	0	4	2			1	3		2
19	3280703	3	Meskan	Eresha,03	butajira	4	220312	3	29	2	1	Distractive delivery	1	6	no	0	31	3000	0	0	2	1	2		1	125	1	0	1	1	4	1		6	IESO+midwife	5	IESO+Midwife	2	2	0	4	2			1	1	1	2
20	3212406	3	Silti	daborbiti	no	4	220313	4	22	1	1	Distractive delivery	1	6	no	0	38	3800	0	0	2	2	1		5	5	1	0	2	1	4	1		1		3		1	1	36	4	2			3	1	2	1	1
21	970911	3	Meskan	no	no	4	261213	5	30	1	1	normal svd	1	6	no	0	34	2200	0	0	2	3	1		1	125	1	0	1	1	3	6		3		3		2	2	0	4	2			5	3		2
22	1907004	3	Butajira	Erimzaf,05	butajira	4	270412	4	36	2	1	normal svd	1	6	no	0	30	1400	0	0	2	2	1		5	15	1	0	1	2		6		3		3		1	1	77	2	1			1	1	1	1	1
23	7111412	3	Soddo woreda	2	bue	4	220512	4	25	2	1	normal svd	1	6	no	0	34	2300	0	0	2	3	1		2	125	1	0	1	1	3	6		3		3		2	2	0	1	1			3	1	2	2
24	183111	3	Butajira	5	butajira	4	80312	3	28	2	1	normal svd	1	6	no	0	32	2200	0	0	2	3	2		1	125	1	0	1	2		6		3		3		2	2	0	1	1			3	1	2	2
25	3424005	3	Mareko	1	koshe	4	40210	1	25	2	1	normal svd	1	7	Polyhydraminous	1	35	1000	0	0	2	3	1		5	15	1	0	1	2		6		5	Surgery specialist	3		1	1	77	4	2			5	3		1	2
26	8602508	3	Meskan	mwegesa	meskan	4	190111	2	27	1	1	normal svd	1	6	no	0	32	1900	0	0	2	3	1		2	25	1	0	1	2		6		3		3		2	2	0	4	2			5	3		2
27	861807	3	Meskan	Dsherg	meskan	4	280610	2	26	1	1	normal svd	1	1	no	0	36	2400	0	0	2	1	2		2	25	1	0	1	1	1	6		6	IESO+midwife	5	IESO+Midwife	2	2	0	1	1			3	1	2	1	1
28	1473105	3	Butajira	Eresha,05	butajira	4	20609	1	28	2	1	normal svd	1	6	no	0	31.2	1500	0	0	2	3	2		5	25	1	0	1	2		6		3		3		2	2	0	4	2			5	3		1	2
29	410906	3	Meskan	yetebon	meskan	4	130811	3	26	2	1	normal svd	1	4	no	0	37	3200	0	0	2	3	1	1	4	45	1	0	2	1	3	1		1		1		2	2	0	1	1			5	3		2
30	281908	3	Meskan	1	enseno	4	161011	2	29	2	1	normal svd	1	6	no	0	36	2900	0	0	2	2	2		5	5	1	0	1	2		6		3		3		2	2	0	4	2			5	3		2
31	948108	3	Meskan	geneme	meskan	4	80709	1	28	1	1	normal svd	1	6	no	0	34	2400	0	0	2	3	2		1	125	1	0	1	2		6		3		3		2	2	0	4	2			3	1	2	2
32	1678204	3	Meskan	diram	meskan	4	110509	1	26	1	1	normal svd	1	3	no	0	29	1800	0	0	2	3	2		1	125	1	0	1	1	2	6		3		3		2	2	0	4	2			5	3		2
33	7812606	3	Meskan	lejore	meskan	4	211109	1	29	1	1	normal svd	1	6	no	0	36	2600	0	0	2	3	1		5	5	1	0	1	1	1	6		3		3		2	2	0	4	2			5	3		2
34	43809	3	Meskan	dirama	meskan	4	240512	4	27	1	1	normal svd	1	6	no	0	36	2400	3	4	1		2	1	5	25	1	0	1	1	1	6		6	IESO+midwife	5	IESO+Midwife	2	2	0	2	1			5	3		2
35	1035411	3	Meskan	jele-02	no	4	150511	3	25	1	1	normal svd	1	6	no	0	38	3500	0	0	2	3	2		5	5	1	0	2	1	3	1		3		3		2	2	0	4	2			5	2		2
36	382411	3	Meskan	Erenzaf,05	Butajira	4	130511	3	24	2	4	Episiotomy	1	6	no	0	32.5	1800	0	0	2	1	1		5	5	1	0	1	1	4	1		2		2		1	1	31.5	5	2			1	1	1	1	3
37	2488211	3	Soddo woreda	ajeti	no	4	10311	2	29	1	2	CS	1	5	CPD	0	38	3000	6	7	1		2	1	5	5	1	0	2	1	4	1		4		4		2	2	0	4	2			3	1	2	2
38	1411211	3	Meskan	Eresha,03	Butajira	4	220711	3	28	2	2	CS	1	6	no	0	38	3500	6	7	1		2	1	5	45	1	0	2	1	4	6		2		2		2	2	0	5	2			5	3		2
39	3079809	3	tora	1	tora	5	90809	1	33	1	1	normal svd	1	6	no	0	35	2300	0	0	2	3	2		5	5	1	0	1	1	1	6		3		3		2	2	0	4	2			5	2		2
40	1514311	3	lanfuro	terara	terara	5	20911	1	40	1	2	CS	1	6	no	0	37	2500	6	7	1		2	1	4	45	1	0	2	2		6		3		3		2	2	0	4	2			3	1	2	2
41	3334711	3	halaba	halaba	none	5	120911	1	42	1	1	normal svd	1	6	no	0	38	2700	5	7	1		1	1	5	5	1	0	2	1	1	6		3		3		2	2	0	4	2			3	1	2	1	1
42	767909	3	worabe	2	worabe	5	280709	1	38	1	1	normal svd	1	6	no	0	37	2100	0	0	2	1	2		1	125	1	0	2	2		6		3		3		2	2	0	4	2			1	1	1	1	1
43	1392211	3	azernet	azernet	none	5	170611	3	39	1	2	CS	1	6	no	0	39	3700	7	9	1		2	1	4	45	1	0	2	1	2	6		3		3		2	2	0	4	2			3	1	2	1	1
44	2113711	3	worabe	2	worabe	5	40411	2	41	2	1	normal svd	1	6	no	0	36	1800	4	5	1		2	1	1	125	1	0	1	2		6		3		3		2	2	0	1	1			3	1	2	1	1
45	1229611	3	dalocha	1	dalocha	5	150411	2	37	2	1	normal svd	1	6	no	0	39	3200	6	8	1		2	1	4	45	1	0	2	1	1	1		3		3		2	2	0	4	2			3	1	2	1	1
46	567113	3	eastazernet	bucha	none	5	221013	5	31	1	1	normal svd	1	6	no	0	39	2900	0	0	2	1	2		5	5	1	0	2	2		3		3		3		2	2	0	4	2			3	1	2	2
47	176713	3	kebet	1	kebet	5	270813	5	28	2	2	CS	1	6	no	0	38	3000	6	7	1		1	1	4	45	1	0	2	1	2	3		3		3		2	2	0	4	2			1	1	1	1	1
48	8223713	3	lamfuro	amiche	no	5	291013	5	28	1	1	normal svd	1	6	no	0	40	2400	3	5	2	1	2		2	25	1	0	2	2		6		3		3		2	2	0	1	1			3	1	2	2
49	1318113	3	alchoweriro	lemseh	no	5	170713	5	36	1	1	normal svd	1	6	no	0	36	2400	0	0	2	2	1		5	5	1	0	1	2		6		3		3		2	2	0	4	2			3	1	2	1	1
50	2953213	3	dalocha	1	dalocha	5	260613	5	29	2	1	normal svd	1	6	no	0	40	3200	9	10	1		2	1	5	5	1	0	2	1	2	6		3		3		2	2	0	1	1			3	1	2	1	1
51	1609912	3	worabe	2	worabe	5	180912	4	20	2	1	normal svd	1	6	no	0	38	2600	0	0	2	3	1		2	15	1	0	2	2		1		2		2		2	2	0	2	1		Amoxaciline 500mg po Tid	1	1	1	2
52	2145912	3	alkeso	1	alkeso	5	160612	4	35	1	1	normal svd	1	6	no	0	39	3000	0	0	2	1	1		5	5	1	0	2	1	4	1		6	Resident	5	Resident	1	1	77	4	2	personal hygine/nutrition	Ibuprofen 400mg	3	1	2	1	1
53	14710	3	lanfuro	girinzila	no	5	10110	1	20	1	2	CS	1	6	no	0	0	2200	0	0	2	2	2		5	5	1	0	2	1	3	1		1		1		2	2	0	1	1			3	1	2	1	1
54	1691611	3	sankura	1	sankura	5	210912	1	30	2	1	normal svd	1	6	no	0	40	3000	0	0	2	2	1		5	125	1	0	2	1	3	1		3		3		2	2	0	2	1			3	1	2	1	1
55	1535411	3	Arbamicnch town	elber	Arbaminch	10	10212	3	20	2	1	normal svd	1	6	no	0	38	2800	6	8	1		1	1	5	5	1	0	2	1	3	6		2		2		1	1	36	2	1			1	1	1	1	1
56	692812	3	Arbaminch town	01 fana	arbaminch	10	210912	4	26	2	1	normal svd	1	6	no	0	36.03	1500	3	0	2	3	2		5	5	1	0	1	2		6		6	Midwife+Medical Intern	5	Midwife+Medical Intern	1	1	7.6	4	2			1	1	1	1	1
57	8457108	3	bonke	tona	gerese	10	250213	4	19	1	1	normal svd	1	6	no	0	37	2000	0	0	2	2	2		2	5	1	0	2	2		6		3		3		2	2	0	4	2			5	3		1	1
58	2769312	3	Arbaminch zuria	sharo	no	10	120912	4	30	1	1	normal svd	1	7	Polyhydraminous	1	37	1900	4	5	1		1	1	1	125	1	0	2	2		6		6	Midwife+Medical Intern	5	Medical Intern	3	1	77	4	2			5	3		2
59	3854604	3	derashe	worisa	gidole	10	60112	3	32	1	2	CS	1	7	Polyhydraminous	1	39	1300	6	9	1		2	1	2	25	1	0	2	2		6		2		2		1	1	18.2	4	2			5	3		1	1
60	2372508	3	Arbaminch Town	secha	arbaminch	10	301213	5	25	2	1	normal svd	1	7	Polyhydraminous+PROM	1	36.2	2900	0	0	2	3	2		5	5	1	0	1	2		6		2		2		1	1	23.3	4	2			1	1	1	1	1
61	3858413	3	mirab abaya	birbir 01	mirab	10	241213	5	22	2	4	Episiotomy	1	6	no	0	39	2500	7	8	1		2	1	5	5	1	0	2	1	2	6		3		3		2	2	0	4	2			3	1	2	2
62	2348310	3	Gomda	bunint	no	10	220810	2	22	1	1	normal svd	1	7	Polyhydraminous	1	23.3	1750	3	4	1		2	1	5	125	2	2	1	2		6		6	IESO+Medical Intern	4		1	1	23.3	2	1			3	1	2	1	1
63	2681111	3	Arbaminch Town	sikela	Arbaminch	10	20212	3	24	2	2	CS	1	6	no	0	37	3600	4	5	2	2	2		5	5	1	0	2	1	3	6		4		4		2	2	0	4	2			4	1	3	1	1
64	1054012	3	Arbaminch Town	Nechsar	Arbaminch	10	201012	4	27	2	1	normal svd	1	7	Severe polyhydraminous	2	42.4	3200	0	0	2	1	2		5	5	1	0	3	2		6		2		3		1	1	37	4	2			1	1	1	1	1
65	1679512	3	sugen	gumide	gumide	10	180512	4	31	1	1	normal svd	1	6	no	0	0	0	0	0	2	3	2		5	5	1	0	4	1	3	1		3		3		2	2	0	4	2			5	2		2
66	1794613	3	Arbaminch Town	sikela	Arbaminch	10	251013	5	33	2	1	normal svd	1	6	no	0	39	3700	8	9	1		2	1	5	5	1	0	2	1	4	6		2		5	IESO+Midwife	1	1	38	2	1			1	1	1	1	1
67	579714	3	mirab abaya	yaike	mirab abaya	10	20314	5	20	1	1	normal svd	1	5	Prolonged PROM+Polyhydraminou	1	20	1200	0	0	2	1	2		5	5	1	0	1	5		6		2		5	Medical Intern	1	1	28.1	1	1			4	1	3	1	3
68	35480113	3	Arbminch zuriya	mile	no	10	291113	5	32	1	1	normal svd	1	5	no	0	0	3000	0	0	2	3	2	2	5	5	1	0	2	2		6		3		3		1	1	34	1	1			5	2		1	1
69	1172613	2	Gimbo	shobol	Gimbo	7	240613	5	30	1	1	normal svd	1	7	Polyhydraminous	1	33	1400	0	0	2	1	2		1	15	1	0	1	2		6		3		3		1	1	33	1	1			1	1	2	1	1
70	30317	2	Adiyo	mera	no	7	120412	3	25	1	1	normal svd	1	6	no	0	38	2000	0	0	2	2	1		5	5	1	0	2	2		6		3		3		2	2	0	4	2			5	2		2
71	103514	2	Gimbo	zingage	no	7	170114	5	35	1	1	normal svd	1	3	no	0	35	1300	0	0	2	1	2		5	5	1	0	1	2		6		3		3		1	1	77	4	2			3	1	2	2
72	1681811	2	Decha	wadiyo	no	7	120711	3	30	1	1	normal svd	1	3	no	0	38	3400	0	0	2	2	2		5	5	1	0	2	2		6		3		3		2	2	0	4	2			3	1	2	2
73	3031711	2	Adiyo	Adiyo	no	7	120412	3	25	1	1	normal svd	1	6	no	0	39	2000	0	0	2	2	1		5	5	1	0	2	2		6		3		3		2	2	0	4	2			5	2		2
74	2329212	2	Bita	boba	boba	7	201212	4	20	1	2	CS	1	5	Face pesentation	0	0	3500	3	0	2	2	2		4	45	1	0	2	2		6		4		4		2	2	0	4	2			3	1	2	2
75	1172613	2	Gimbo	gimbo	no	7	240613	5	30	1	1	normal svd	1	6	no	0	33	1400	0	0	2	1	2		5	5	1	0	1	2		6		3		3		2	2	0	4	2			3	1	2	2
76	103514	2	Gimbo	zingai	no	7	170114	5	35	1	1	normal svd	1	6	no	0	38	1300	0	0	2	1	1		5	5	1	0	2	2		6		3		3		2	2	0	4	2			5	3		2
77	965909	2	Debub bench	abiy3	no	6	270710	2	30	1	1	normal svd	1	6	no	0	0	3100	3	6	1		1		5	5	1	0	2	1	3	6		3		3		2	2	0	4	2			2	1	1	2
78	1539310	2	sheybench	sirtine	no	6	260610	2	30	1	1	normal svd	1	1	no	0	36	2100	0	0	2	2	2		5	5	1	0	1	1	3	6		3		3		2	2	0	1	1			3	1	2	1	1
79	1149006	2	sheybench	gigemetel	no	6	180409	1	24	1	1	Distractive delivery	1	6	no	0	36	1800	0	0	2	1	1		5	5	1	0	1	2		6		1		1		2	2	0	4	2			3	1	2	1	1
80	1989613	2	shybench	keshta	no	6	240813	5	28	1	1	normal svd	1	6	no	0	0	1400	0	0	2	3	1		5	5	1	0	1	2		6		3		3		2	2	0	4	2			3	1	1	2
81	592111	2	Debub bench	gelite	no	6	150413	4	22	1	1	Distractive delivery	1	6	no	0	39	3500	0	0	2	2	2		5	5	1	0	2	1	3	1		2		2		1	1	24	4	2			3	1	2	1	1
82	1080310	2	Guraferda	biftu	biftu	6	80510	2	23	1	1	normal svd	1	6	no	0	37	2600	0	0	2	1	1		5	5	1	0	2	1	1	6		2		2		2	2	0	4	2			3	1	2	2
83	458310	2	Teppi	8	Tepi	6	50310	1	29	2	1	normal svd	1	6	no	0	38	0	0	0	2	3	2		5	5	1	0	2	2		1		3		3		1	1	77	4	2			3	1	1	2
84	5124706	2	minet goldiya	ferfea	no	6	230210	1	36	1	1	normal svd	1	6	no	0	0	0	0	0	2	3	2		5	5	1	0	4	2		6		2		3		1	1	24	5	2			3	1	2	2
85	1327210	2	Mizan	addis ketema	mizan	6	60610	2	23	2	1	normal svd	1	6	no	0	34	1100	0	0	2	2	2		1	125	1	0	1	2		6		2		2		1	1	27	5	2			1	1	1	1	1
86	1646912	2	Debub bench	keberta	no	6	80712	4	28	1	1	normal svd	1	6	no	0	0	1000	0	0	2	3	2		5	5	1	0	1	2		6		2		2		1	1	20	4	2			1	1	1	1	1
87	386109	2	mizan aman	hibret	mizan aman	6	180809	1	23	2	2	CS	1	5	Obstracted labor	0	36	2900	2	4	1		2	3	5	5	1	0	1	2		6		1		1		1	1	24	4	2			1	1	1	1	3
88	1089409	2	Debub bench	bebeka	no	6	301009	1	22	1	1	normal svd	1	6	no	0	38	3000	2	5	1		2	1	4	45	1	0	2	1	3	1		3		3		2	2	0	4	2			1	1	1	1	1
89	382810	2	Guraferda	biftu	biftu	6	240210	2	20	1	1	normal svd	1	6	no	0	0	1700	0	0	2	1	1		5	5	1	0	1	2		6		3		3		2	2	0	4	2			1	1	1	1	1
90	508510	2	Guraferda	biftu	no	6	100310	1	28	1	3	Forceps	1	6	no	0	0	0	0	0	2	3	1		5	5	1	0	4	1	3	1		2		2		1	1	77	4	2			3	1	2	1	1
91	704410	2	mizan	sheshera	Aman	6	230510	2	28	2	1	normal svd	1	6	no	0	36	2000	0	0	2	2	1		5	5	1	0	1	2		6		4		4		2	2	0	5	2			3	1	2	1	1
92	1380110	2	Debub bench	keberta	no	6	140610	2	25	1	1	normal svd	1	1	no	0	36	2000	0	0	2	2	2		2	25	1	0	1	2		6		3		3		2	2	0	5	2			3	1	2	1	1
93	4821705	2	Mizan	shashake	Aman	6	270710	2	18	2	1	Assisted breech delivery	1	6	no	0	40	2100	9	10	1		1	1	5	5	1	0	2	1	3	6		4		4		2	2	0	5	2			1	1	1	1	1
94	4821705	2	Mizan	shashake	Aman	6	270710	2	18	2	1	Assisted breech delivery	1	6	no	0	40	2500	3	7	1		2	1	4	45	1	0	2	1	3	6		4		4		2	2	0	5	2			1	1	1	1	1
95	1118511	2	Guraferda	keberta	no	6	70511	3	30	1	2	CS	1	6	no	0	0	2000	0	0	2	1	2		2	25	1	0	2	2		6		4		4		2	2	0	5	2			3	2		1	3
96	2356011	2	Dimma	markes	no	6	81011	3	27	1	1	normal svd	1	6	no	0	0	1200	0	0	2	1	2		2	25	1	0	1	2		6		3		3		2	2	0	5	2			5	2		2
97	2324311	2	yeki	fide	no	6	121011	3	28	1	1	normal svd	1	6	no	0	0	1600	0	0	2	2	2		2	25	1	0	1	1	3	1		2		2		2	2	0	5	2			3	1	2	1	3
98	364112	2	Minitgoldiya	kubit	no	6	170212	3	26	1	2	CS	1	5	Obstracted labor	0	0	2800	0	0	2	2	1		5	5	1	0	2	1	1	1		1		1		2	2	0	2	1			3	1	2	1	2
99	2161409	3	Guraferda	Abiy-4	no	6	160512	4	18	1	1	normal svd	1	6	no	0	34	1800	0	0	2	1	1		2	125	1	0	1	1	1	1		2		2		2	2	0	4	2			3	1	2	1	3
100	372612	2	Mizan aman	Kometa	Mizan aman	6	150812	4	25	2	1	normal svd	1	6	no	0	0	3000	6	8	1		1	1	5	5	1	0	2	1	3	6		2		2		1	1	24	4	2			1	1	1	1	1
101	1954512	2	Guraferda	biftu	no	6	60912	4	30	1	1	normal svd	1	6	no	0	0	1600	0	0	2	1	1		5	5	1	0	1	2		6		3		3		2	2	0	1	1			3	2		1	1
102	2209613	2	debub bench	no	no	6	110913	5	27	1	2	CS	1	6	no	0	0	2900	0	0	2	2	1		5	5	1	0	2	1	3	1		2		2		2	2	0	4	2			3	1	2	1	1
103	508510	2	Guraferda	biftu 01	biftu	6	100310	1	28	1	3	Vacuum	1	6	no	0	38	2900	0	0	2	2	1		5	5	1	0	2	1	3	1		2		2		2	2	0	1	1			3	1	2	2
104	2339509	1	Aletawendo	2	Aletawendo	2	201109	1	19	2	1	normal svd	1	6	no	0	38	2900	5	6	1		2	3	5	5	1	0	2	1	3	6		3		3		2	2	0	4	2			3	1	2	2
105	2676004	1	Aleta chuko	1	Aletachuko	2	230612	4	28	2	1	normal svd	1	6	no	0	36	2500	0	0	2	2	1		5	5	1	0	1	2		6		3		3		2	2	0	1	1			3	1	2	2
106	245110	3	damotwyda	no	no	11	90610	2	22	1	1	normal svd	1	6	no	0	36	900	0	0	2	1	1		2	5	1	0	1	2		6		3		3		2	2	0	5	2			3	2		2
107	3812	3	Areka	1	Areka	11	230812	4	21	2	1	normal svd	1	6	no	0	38	700	0	0	2	1	2		2	25	1	0	2	2		6		2		2		2	2	0	5	2			3	1	2	2
108	570714	3	Boloso Sore	no	no	11	40214	5	18	1	1	normal svd	1	6	no	0	39	2400	0	0	2	2	1		5	25	1	0	2	3	3	6		2		2		2	2	0	4	2			5	3		2
109	3801413	3	sodo	o2	sodo	11	300913	5	30	2	1	normal svd	1	6	no	0	38	3500	0	0	2	2	2		5	5	1	0	2	1	1	1		1		1		1	1	77	2	1			4	1	4	2
110	5270713	3	Boditi	2	Boditi	11	270610	2	24	2	1	normal svd	1	6	no	0	0	2000	0	0	2	1	1		5	5	1	0	2	2		6		6	Resident	5	Resident	2	2	0	2	1			3	1	2	1	1
111	4309709	1	Wondogenet	1	wondogenet	1	140909	1	28	2	1	normal svd	1	6	no	0	39	2800	0	0	2	1	2		5	5	1	0	2	1	3	1		3		3		1	1	32	1	1			3	1	2	1	1
112	6645010	1	shashmene	1	shashmene	1	271210	2	20	2	1	normal svd	1	6	no	0	28	1000	0	0	2	1	2		5	5	1	0	1	2		6		3		3		1	1	34	4	2			4	1	3	1	2
113	751410	1	Halaba	2	Halaba	1	170210	1	30	2	1	normal svd	1	6	no	0	31	2000	0	0	2	1	2		1	15	1	0	1	2		6		3		3		2	2	0	4	2			1	1	1	1	1
114	2409909	1	Bishan guracha	rural kebele	none	1	260509	1	18	1	1	normal svd	1	6	no	0	0	4000	0	0	2	2	2		6	6	1	0	2	2		6		5		3		2	2	0	2	1			3	1	2	2	#NULL!
115	1988904	1	Hawassa	no data	Hawassa	1	20509	1	30	2	1	normal svd	1	6	no	0	36	1000	0	0	2	1	2		5	125	1	0	1	2		1		3		3		2	2	0	1	1			1	1	1	1	1
116	1817809	1	Hawassa	1	Hawassa	1	230409	1	18	2	1	normal svd	1	6	no	0	38.3	2500	0	0	2	1	2		5	5	1	0	2	2		1		3		3		2	2	0	4	2			1	1	1	1	1
117	1654712	1	Hawassa	Adis ketema	Hawassa	1	70412	3	26	2	1	normal svd	1	6	no	0	30	1600	0	0	2	1	2		5	125	1	0	1	2		6		5		3		1	1	32	4	2			3	1	2	1	1
118	38012	1	west arsi	1	dodola	1	170212	3	25	1	1	normal svd	1	6	no	0	30	1800	0	0	2	1	2		5	5	1	0	1	2		6		3		3		2	2	0	2	1			1	1	1	1	1
119	3187611	1	Shashemene	4	shashmene	1	60811	3	27	2	1	normal svd	1	6	no	0	30	1800	0	0	2	2	1		5	125	1	0	1	3	2	6		6	Midwife+Medical Intern	3		2	2	0	4	2			3	1	2	1	1
120	5192411	1	Shashemene	1	shashemene	1	31011	3	26	2	1	normal svd	1	6	no	0	37	2200	0	0	2	2	1		5	25	1	0	2	3	3	6		5		3		1	1	24	1	1			1	1	1	1	2
121	6593510	1	Dodola	no	dodola	1	301210	2	20	1	1	normal svd	1	6	no	0	30	900	0	0	2	1	2		5	125	1	0	1	2		6		5		3		1	1	27	2	1			3	1	2	1	1
122	2220612	1	shashmene	3	shashmene	1	80512	4	23	2	1	normal svd	1	6	no	0	39	3900	9	5	1		2	1	5	5	1	0	2	1	2	6		3		3		1	1	38	4	2			4	1	3	1	2
123	2240713	1	wondogenet	2	wondogenet	1	270813	5	27	2	1	normal svd	1	6	no	0	32	1600	0	0	2	2	2		5	125	1	0	1	2		6		3		3		1	1	32	4	2			1	1	1	2	#NULL!
124	1245014	1	shashmene	1	shashmene	1	140414	5	28	2	1	normal svd	1	6	no	0	28	1800	0	0	1		1	1	5	25	1	0	1	1	1	1	severe hydrocephaly	1		1		1	1	24.6	2	1			4	1	3	1	2
125	2634013	1	shashmene	1	shashmene	1	270713	5	27	2	1	normal svd	1	7	Polyhydraminous	1	27	1700	0	0	2	2	1		5	5	1	0	1	5		6		3		3		1	1	27	2	1			4	1	3	1	2
126	1518912	1	Alnsobi	3	oromia	1	30412	3	20	2	1	normal svd	1	6	no	0	32	1400	0	0	2	1	1		5	125	1	0	1	1	2	1		3		3		1	1	32	4	2			1	1	1	1	1
127	67736213	3	Hossana	addis ketema	Hossana	12	140113	4	22	2	1	normal svd	1	6	no	0	0	2100	0	0	2	2	2		5	25	1	0	2	2		6		3		3		2	2	0	1	1			3	1	2	1	1
128	590125	3	Kembata	1	doyogena	12	70812	4	26	2	1	normal svd	1	6	no	0	39.3	1300	0	0	2	2	1		1	15	1	0	2	2		6		2		2		2	2	0	2	1			3	1	2	2	#NULL!
129	628650	3	lemo	1	shurmo	12	280712	4	30	1	1	normal svd	1	8	PROM	0	32.6	1600	0	0	2	1	2		1	15	1	0	1	2		6		6	Midwife+Medical Intern	5	Medical Intern	1	1	31	1	1			3	1	2	1	1
130	546125	3	Hossana	Jelonaremo	Hossana	12	231212	4	27	2	1	normal svd	1	6	no	0	41.4	3200	7	9	1		2	1	5	5	1	0	2	1	3	6		3		3		2	2	0	4	2			5	2	#NULL!	2	#NULL!
131	648751	3	Analemo	le kebecho	no	12	170113	4	25	2	1	normal svd	1	7	Polyhydraminous +Preeclampsia	1	32.5	1200	0	0	2	1	2		1	15	1	0	1	2		6		3		3		1	1	32.5	5	2			3	1	2	1	1
132	706586	3	lemo	1	lisana	12	231213	5	28	2	1	normal svd	1	6	no	0	0	1900	0	0	2	1	1		2	25	1	0	1	2		6		3		3		2	2	0	4	2			5	1	2	2	#NULL!
133	699511	3	Hossana	heto	hossana	12	290214	5	29	2	1	normal svd	1	6	no	0	39.2	2400	0	0	2	1	2		2	25	1	0	2	2		6		2		2		1	1	77	5	2			3	1	2	1	1
134	627842	3	shashogo	1	Bonosha	12	230712	4	20	2	1	normal svd	1	7	Polyhydraminous	1	36	1000	0	0	2	2	1		5	15	1	0	1	2		6		3		3		1	1	26.2	2	1			5	2	#NULL!	1	1
135	2511712	3	worabe	anshebso	worabe	5	70812	4	24	2	2	CS	1	6	no	0	40	4000	6	7	1		1	1	5	5	1	0	2	1	1	6		1		1		1	1	77	4	2			1	1	1	1	1
136	4613011	3	Hulbareg	Aginba	no	5	170912	4	25	1	1	normal svd	1	6	no	0	36	1700	0	0	2	3	2		5	5	1	0	1	2		6		3		3		1	1	32	4	2			3	1	2	1	1
137	3431911	3	Hulbareg	achamo	no	5	110913	5	29	1	1	Assisted breech delivery	1	2	no	0	0	1900	0	0	2	2	1		5	5	1	0	1	1	3	3		3		3		1	1	77	4	2			3	1	2	1	1
138	70210	3	dalocha	hebot trora	no	5	90110	1	28	1	1	normal svd	1	7	Polyhydraminous	1	38	1500	0	0	2	1	1		5	5	1	0	2	2		6		3		3		3	1	41	2	1	ambulation,protein/iron rich foods	Amoxacillin 500mg Tid	3	1	2	1	1
139	1999509	3	Dalocha	korocho	no	5	80410	1	30	1	3	Vacuum	1	6	no	0	40	3200	0	0	2	1	1		2	25	1	0	2	2		6		2		2		2	2	0	4	2			3	1	2	1	1
140	1943412	3	Hulbareg	sabole	no	5	20612	4	25	1	1	normal svd	1	6	no	0	39	3200	6	8	1		1	3	5	5	1	0	2	1	1	6		3		3		2	2	0	4	2			3	1	2	1	1
141	1762912	3	Sankura	1	sankura	5	241012	4	35	2	1	normal svd	1	6	no	0	0	2200	5	6	1		2	1	5	45	1	0	2	1	1	6		3		3		2	2	0	3	2			3	1	2	1	1
142	2067710	3	Mitto	1	mitto	5	100210	1	30	2	1	normal svd	1	6	no	0	40	2400	0	0	2	2	1		5	5	1	0	2	2		6		3		3		2	2	0	4	2			3	1	2	1	1
143	4558512	1	shashmene	1	shashmene	1	31312	4	31	2	1	normal svd	1	7	Polyhydraminous	1	34.4	1300	0	0	2	1	2		5	25	1	0	1	2		6		3		3		1	1	77	1	1			4	1	3	1	2
144	1304611	3	halaba	yambo	no	3	100511	3	35	1	1	normal svd	1	7	Polyhydraminous	1	0	1000	0	0	2	1	2		5	25	1	0	1	2		6		4		3		1	1	28.4	2	1			3	1	2	1	1
145	1332311	3	halaba	hamama	no	3	100511	3	40	1	1	Assisted breech delivery	1	6	no	0	0	1500	0	0	2	1	2		5	25	1	0	4	2		6		3		3		2	2	0	5	2			5	3	#NULL!	2	#NULL!
146	1394711	3	shashogo	hoyawa	no	3	150511	3	30	1	1	normal svd	1	4	PPH after delivry +Polyhdraminous	1	40	3000	0	0	2	2	1		5	5	1	0	2	2		6		4		4		3	1	40	5	2			3	1	2	2	#NULL!
147	1523211	3	halaba	gurulabucho	no	3	20611	3	30	1	1	normal svd	1	7	Polyhydraminous	1	37	1000	0	0	2	1	1		5	5	1	0	2	2		6		4		3		2	2	0	2	1			3	1	2	1	1
148	366911	3	halaba	Denebe fama	no	3	120611	3	28	1	1	normal svd	1	6	no	0	40	3200	9	10	1		1	1	5	5	1	0	2	1	1	6		3		3		2	2	0	4	2			1	1	1	2	#NULL!
149	1824511	3	halaba	tuke	no	3	270611	3	27	1	1	normal svd	1	7	Polyhydraminous	1	0	3500	8	9	1		2	1	5	5	1	0	2	1	3	6		3		3		2	2	0	5	2			3	1	2	2	#NULL!
150	1998611	3	Halaba	mu/chambula	no	3	140711	3	30	1	1	normal svd	1	7	Polyhydraminous	1	0	1000	0	0	2	1	1		5	25	1	0	2	2		6		3		3		1	1	30	4	2			3	1	2	1	1
151	3414609	3	halaba	gurara bulcha	no	3	290711	3	32	1	1	normal svd	1	6	no	0	0	4000	0	0	2	2	2		5	5	1	0	2	1	4	1		3		3		2	2	0	4	2			5	2	#NULL!	2	#NULL!
152	2387811	3	halaba	mehrab gurtancho	no	3	220811	3	30	1	1	Distractive delivery	3	6	no	0	0	3200	0	0	2	2	1		5	5	1	0	2	1	4	1		2		2		2	2	0	5	2			3	1	2	2	#NULL!
153	682412	3	shashogo	jamaya	no	3	30312	3	28	1	1	normal svd	1	7	Severe polyhydraminous	2	28	1000	0	0	2	1	2		5	5	1	0	1	2		6		3		3		1	1	28.5	4	2			1	1	1	1	1
154	2341111	3	halaba	debeso	no	3	130312	3	26	1	1	normal svd	1	7	Polyhydraminous	1	0	1000	0	0	2	1	1		5	5	1	0	1	2		1		3		3		1	1	26.6	4	2			5	3	#NULL!	1	1
155	2581211	3	halaba	hamata	no	3	170312	3	22	1	1	normal svd	1	7	Severe polyhydraminous	2	38	1500	0	0	2	1	2		5	5	1	0	2	2		6		4		4		1	1	30.6	4	2			3	1	1	1	1
156	992412	3	halaba	gedeba	no	3	280312	3	23	1	1	Assisted breech delivery	3	7	Polyhydraminous+PROM	1	0	1500	0	0	2	1	1		5	5	1	0	2	2		6		4		3		2	2	0	4	2			3	1	2	1	1
157	1230212	3	halaba	guba sherero	no	3	110412	3	25	1	1	normal svd	1	4	no	0	0	2500	3	0	2	2	1		5	5	1	0	2	1	4	1		4		3		1	1	41	2	1			3	1	2	1	1
158	1280411	3	halaba	Denebe fama	no	3	110412	3	25	1	1	Assisted breech delivery	1	7	Severe polyhydraminous	2	42	1200	0	0	2	1	2		5	5	1	0	2	2		6		3		3		3	1	28.1	4	2			1	1	1	1	1
159	30806	3	halaba	tefo	no	3	190412	3	20	1	1	normal svd	1	6	no	0	0	2750	0	0	2	2	1		5	5	1	0	2	2		6		3		3		2	2	0	4	2			5	3	#NULL!	2	#NULL!
160	1288112	3	halaba	Lay bedene	halaba	3	260412	4	27	1	1	normal svd	1	6	no	0	0	2600	0	0	2	2	2		5	5	1	0	1	2		6		3		3		2	2	0	4	2			3	1	2	1	1
161	2200412	3	halaba	L/bere	halaba	3	160712	4	24	2	1	normal svd	1	6	no	0	0	1500	0	0	2	1	1		2	25	1	0	4	2		6		3		3		2	2	0	4	2			1	1	1	1	1
162	2131407	3	halaba	zele fere	no	3	130912	4	20	1	1	normal svd	1	6	no	0	0	1500	0	0	2	1	2		5	25	1	0	1	1	1	1		3		3		2	2	0	4	2			1	1	1	2	#NULL!
163	901412	3	halaba	zala	no	3	51012	4	25	1	1	normal svd	1	6	no	0	39.1	3500	7	9	1		1	1	5	5	1	0	2	1	3	6		3		3		2	2	0	4	2			1	1	1	2	#NULL!
164	379313	3	halaba	Tach bedena	no	3	120213	4	30	1	1	normal svd	1	7	Polyhydraminous	1	0	800	0	0	2	1	2		5	5	1	0	4	2		6		2		3		1	1	25.6	2	1			3	1	2	1	1
165	562513	3	sankura	kore	no	3	20313	4	26	1	1	normal svd	1	7	Polyhydraminous	1	28	2000	0	0	2	2	2		5	25	1	0	1	2		6		3		3		1	1	28	2	1			3	1	1	1	1
166	886013	3	halaba	wanja	no	3	80413	4	28	2	1	normal svd	1	6	no	0	0	3000	8	9	1		2	1	5	5	1	0	2	2		6		3		3		2	2	0	4	2			3	1	2	2	#NULL!
167	1059512	3	kembata	mazoriya	mazoriya	3	240413	5	21	2	1	normal svd	1	6	no	0	38	3200	4	0	2	2	2		5	5	1	0	2	2		6		3		3		2	2	0	4	2			5	1	2	2	#NULL!
168	2233808	3	halaba	zala	no	3	110713	5	18	1	1	normal svd	1	6	no	0	39	1200	0	0	2	3	1		5	5	1	0	2	2		6		3		3		2	2	0	4	2			1	1	1	2	#NULL!
169	2016413	3	halaba	wanja bere	halaba	3	191113	5	28	2	1	normal svd	1	6	no	0	0	1600	6	7	1		1	1	2	25	1	0	1	1	1	1		5		3		1	1	27.1	4	2			1	1	1	1	3
170	2179006	3	halaba	wanja bere	halaba	3	31313	5	30	2	1	normal svd	1	6	no	0	39	3600	7	9	1		2	1	5	5	1	0	2	1	3	1		3		3		2	2	0	5	2			1	1	1	1	1
171	1382613	3	badewacho	keranso	no	3	270513	5	23	1	1	normal svd	1	6	no	0	0	1000	0	0	2	1	2		5	5	1	0	4	2		6		3		3		2	2	0	4	2			3	1	2	2	#NULL!
172	360613	3	halaba	sorge	no	3	280513	5	21	1	1	normal svd	1	6	no	0	0	2000	2	0	2	2	1		5	25	1	0	1	1	2	1		3		3		1	1	27.2	5	2			3	1	2	1	1
173	1448913	3	halaba	wanja bere	halaba	3	70613	5	19	2	1	normal svd	1	6	no	0	0	1100	0	0	2	2	1		5	25	1	0	1	2		6		3		3		1	1	32.1	2	1			1	1	1	1	1
174	1746213	3	halaba	first tuka	no	3	10713	5	25	1	1	normal svd	1	7	Polyhydraminous	1	0	750	0	0	2	3	2		5	5	1	0	2	2		6		3		3		1	1	38	5	2			3	1	2	1	1
175	759713	3	halaba	second hansho	no	3	50713	5	27	1	1	normal svd	1	7	Polyhydraminous	1	0	1200	0	0	2	3	2		5	25	1	0	1	2		6		2		3		1	1	28.3	2	1			3	1	2	1	1
176	252314	3	halaba	gerema	no	3	300114	5	25	1	1	normal svd	1	6	no	0	40	3000	0	0	2	1	1		5	5	1	0	2	1	3	6		4		4		2	2	0	2	1	routine PNC check up		3	1	2	1	1
177	2478012	3	halaba	sorge	no	3	200912	4	22	1	1	normal svd	1	7	Polyhydraminous	1	0	1100	0	0	2	1	2		5	5	1	0	1	2		6		3		3		1	1	32	2	1			1	1	1	1	1
178	547914	3	halaba	Ajoluko	no	3	10314	5	25	1	1	normal svd	1	6	no	0	39	3700	5	0	2	2	1		5	5	1	0	2	3	1	6		2		3		3	1	40	2	1			3	1	2	1	1
179	862309	3	shashogo	shybe	no	3	151013	5	20	1	1	normal svd	1	7	Polyhydraminous	1	28.3	500	0	0	2	1	2		5	5	1	0	1	3	3	6		2		3		1	1	28.3	5	2			3	1	2	1	1
180	2432412	3	halaba	second choroko	no	3	120912	4	20	1	1	normal svd	1	6	no	0	38	3000	3	0	2	3	1		5	5	1	0	2	1	1	6		2		5	IESO+Midwife	2	2	0	2	1			5	2	#NULL!	2	#NULL!
181	2449212	3	halaba	first chokoro	no	3	150912	4	30	1	1	normal svd	1	6	no	0	38	3200	0	0	2	3	2		5	5	1	0	2	2		6		4		4		1	1	24	2	1			5	2	#NULL!	1	1
182	1102011	3	jinka	Arkisa	jinka	8	160611	3	24	2	1	normal svd	1	1	no	0	41	3700	8	9	1		2	1	5	5	1	0	2	1	1	6		3		3		1	1	24	5	2			3	1	2	1	1
183	1038212	3	webhamer	webhamer	no	8	60612	4	34	1	2	CS	1	7	Polyhydraminous	1	40	4000	2	0	2	2	2		5	5	1	0	2	1	3	2		2		2		2	2	0	5	2			3	1	2	1	1
184	2155710	3	jinka	tenadam	jinka	8	271110	2	29	1	1	normal svd	1	6	no	0	37	2600	0	0	2	2	1		5	5	1	0	2	1	1	1		3		3		1	1	24	4	2			3	1	2	1	1
185	1862110	3	kako	kako	no	8	261010	2	30	1	1	normal svd	1	3	no	0	36	2200	4	6	1		2	1	5	45	1	0	1	1	3	6		2		2		1	1	28	5	2			3	1	2	1	1
186	1929911	3	Jinka	Arkisa	Jinka	8	131113	5	20	2	1	normal svd	1	8	PROM	0	32	1000	0	0	2	1	2		5	25	1	0	1	3	4	6	PROM	4		3		1	1	27.2	5	2			3	1	2	1	2
187	10612	3	kayesa	kayesa	no	8	20112	3	22	1	1	normal svd	1	6	no	0	38	3100	0	0	2	2	1		5	5	1	0	2	1	1	6		3		3		2	2	0	4	2			3	1	2	2	#NULL!
188	578813	3	Jinka	Arkisa	Jinka	8	30413	4	28	2	3	Vacuum	1	2	no	0	0	3100	6	7	1		2	1	5	25	1	0	2	1	3	2		2		2		2	2	0	4	2			1	1	1	2	#NULL!
189	582913	3	Bako	no	Bako	8	30413	4	36	2	2	CS	1	3	no	0	39	3500	3	6	1		2	1	4	45	1	0	2	1	1	6		1		1		2	2	0	4	2			3	1	2	1	1
190	220813	3	Jinka	Tenadme	Jinka	8	100213	4	30	2	1	normal svd	1	6	no	0	38.4	2690	6	7	1		2	2	5	5	1	0	2	1	1	6		3		3		2	2	0	5	2			3	1	2	2	#NULL!
191	215212	3	mallea	mallea	no	8	70212	3	20	1	1	normal svd	1	6	no	0	38.6	3100	0	0	2	2	1		5	5	1	0	2	1	4	1	severe hydrocephaly	3		3		2	2	0	5	2			3	1	2	1	1
192	2249210	3	jinka	mahale Arada	jinka	8	100314	5	28	2	1	normal svd	1	6	no	0	39	3100	5	6	1		2	1	5	5	1	0	2	1	2	2		3		3		2	2	0	5	2			1	1	1	1	1
193	2138809	3	omorate	kangtime	kangtime	8	130210	1	20	1	1	normal svd	1	6	no	0	39	3500	5	8	1		2	1	5	5	1	0	2	3	3	6		2		2		2	2	0	5	2			3	1	2	1	1
194	1912309	3	S/Ari	gazer	Gazer	8	71109	1	22	2	1	normal svd	1	6	no	0	34	1200	0	0	2	1	2		5	125	1	0	1	3	3	6		3		3		2	2	0	5	2			3	1	2	1	1
195	608212	3	D/Ari	Baytsemale	no	8	70412	3	30	1	1	normal svd	1	7	Polyhydraminous	1	33	1000	0	0	2	3	2		5	5	1	0	1	1	3	1		4		3		1	1	28	4	2			1	1	1	1	1
196	152912	3	debub ari	sheshire	no	8	200712	4	20	2	1	normal svd	1	7	Polyhydraminous	1	0	1000	0	0	2	2	2		5	125	1	0	1	2		6		2		3		1	1	24	4	2			3	1	2	1	1
197	2139408	3	Hana	selamago	no	8	280609	1	18	1	1	normal svd	1	6	no	0	35	1300	0	0	2	1	2		1	125	1	0	1	1	2	1		3		3		2	2	0	5	2			3	1	2	1	1
198	981309	3	Hana	selamago	no	8	280609	1	20	1	1	normal svd	1	6	no	0	36	2000	4	7	1		2	1	1	125	1	0	1	1	2	3		1		1		1	1	28	1	1			3	1	2	1	1
199	1644409	3	D/Ari	no	no	8	191009	1	30	1	1	normal svd	1	6	no	0	37	2900	0	0	2	2	2		5	5	1	0	2	1	2	3		2		2		2	2	0	5	2			3	1	2	1	1
200	1876409	3	Jinka	Arkisha	Jinka	8	11109	1	20	2	1	normal svd	1	6	no	0	40	3500	0	0	2	2	1		5	5	1	0	2	1	2	3		3		3		2	2	0	2	1			3	2	#NULL!	1	1
201	1040209	3	Jinka	Tendame	Jinka	8	221209	1	18	2	1	normal svd	1	6	no	0	38	2600	4	0	2	3	2		5	5	1	0	2	1	2	3		1		1		1	1	24.6	2	1			3	1	2	1	1
202	1909812	3	Malle	no	gudo	8	51212	4	22	1	1	normal svd	1	1	no	0	36	2800	0	0	2	1	1		5	125	1	0	4	2		6		3		3		1	1	37	5	2			3	1	2	1	1
203	914313	3	Jinka	Arkisha	Jinka	8	301113	5	18	2	1	normal svd	1	3	no	0	37	2500	5	6	1		2	1	4	45	1	0	2	1	2	2		3		3		2	2	0	1	1		antibiotics,antipain	3	1	2	1	1
204	576506	3	Konso	sohokme	no	9	160811	3	26	1	1	normal svd	1	6	no	0	38	1500	0	0	2	3	1		5	5	1	0	2	2		6		3		3		2	2	0	4	2			3	1	2	1	1
205	1847711	3	Konso	dukatu	no	9	281011	3	20	1	1	normal svd	1	6	no	0	0	2500	7	8	1		2	1	5	5	1	0	2	1	4	6		3		3		2	2	0	4	2			3	1	2	2	#NULL!
206	40812	3	Konso	no	no	9	190212	3	26	1	2	CS	1	6	no	0	37	4200	0	0	2	2	2		5	5	1	0	2	1	1	1		2		2		2	2	0	4	2			3	1	2	1	1
207	1231907	3	konso	teshmale	no	9	60712	4	37	1	2	CS	1	7	Polyhydraminous	1	37	2400	4	0	2	2	2		5	5	1	0	2	2		6		1		1		2	2	0	4	2			1	1	1	1	1
208	1638012	3	konso	arfayde	no	9	110812	4	26	1	1	normal svd	1	6	no	0	36	3500	0	0	2	2	2		5	5	1	0	1	2		1		3		3		2	2	0	1	1			5	2	#NULL!	2	#NULL!
209	1705312	3	Karat	Dera	no	9	240812	4	20	1	1	normal svd	1	6	no	0	36	2500	0	0	2	3	2		5	5	1	0	1	2		6		3		3		2	2	0	5	2			1	1	2	1	1
210	205813	3	konso	yememe	no	9	60213	4	28	1	1	normal svd	1	7	Polyhydraminous	1	36	2000	0	0	2	1	2		2	25	1	0	1	2		6		3		3		2	2	0	4	2			5	2	#NULL!	2	#NULL!
211	545913	3	karat	jarso	no	9	140413	4	25	1	1	normal svd	1	6	no	0	39	2100	0	0	2	1	2		5	25	1	0	2	2		6		3		3		2	2	0	4	2			5	2	#NULL!	1	1
212	1415409	3	Konso	Fasha	no	9	210413	4	30	1	1	normal svd	1	6	no	0	28	1700	0	0	2	1	2		5	125	1	0	1	2		6		3		3		1	1	77	2	1		Antibiotics	3	1	2	2	#NULL!
213	1834113	3	karat	Fasha	no	9	81113	5	35	1	1	normal svd	1	6	no	0	39	2500	7	9	1		1	1	5	5	2	2	2	1	3	6		3		3		2	2	0	5	2			5	2	#NULL!	2	#NULL!
214	2289712	3	Karat	M/Gezaba	no	9	80612	4	25	1	1	normal svd	1	6	no	0	37	2500	0	0	2	2	2		5	5	1	0	2	2		6		3		3		1	1	24	4	2			3	2	#NULL!	1	1
215	299112	3	konso	mdra gezaba	no	9	140812	4	26	1	2	CS	1	3	APH+polyhydraminous	1	40	2600	0	0	2	1	2		5	5	1	0	2	2		6		4		4		2	2	0	4	2			5	2	#NULL!	1	1
216	1934512	3	Karat	Kaho	no	9	10213	4	28	1	1	normal svd	1	7	Polyhydraminous	1	40	3000	0	0	2	2	2		5	5	1	0	2	2		6		3		3		1	1	27	3	2		Iron-sulphate 325mg po 3months	1	1	1	1	1
217	288710	3	mareko	onajayemka	no	4	80210	1	23	1	2	CS	1	5	CPD	0	38	4100	3	5	1		2	1	5	45	1	0	2	1	4	1		4		3		2	2	0	4	2		Ceftriaxone 1gm IV	5	2	#NULL!	1	1
218	14708	3	Mareko	m/demka	no	4	140310	1	35	1	1	normal svd	1	6	no	0	0	1500	0	0	2	3	1		2		1	0	1	3	4	6		3		3		2	2	0	5	2			5	3	#NULL!	2	#NULL!
219	2682206	3	Meskan	Erenzaf,04	Butajira	4	150310	1	30	2	1	normal svd	1	6	no	0	0	3500	0	0	2	3	1		5	5	1	0	2	1	4	6		3		3		2	2	0	5	2			5	2	#NULL!	2	#NULL!
220	640810	3	mareko	datomendifa	no	4	290310	1	28	1	1	normal svd	1	7	Polyhydraminous	1	0	2000	0	0	2	1	2		5	5	1	0	1	2		6		4		4		2	2	0	5	2			5	2	#NULL!	2	#NULL!
221	714610	3	meskan	mekito	no	4	50410	1	21	1	1	normal svd	1	6	no	0	30	1500	0	0	2	3	1		5	5	1	0	1	1	4	1		3		3		3	1	77	4	2			5	2	#NULL!	1	1
222	1922209	3	meskan	eresha,03	butajira	4	220410	1	25	2	4	Episiotomy	1	6	no	0	36	3000	4	7	1		1	1	5	5	1	0	2	1	4	6		3		3		1	1	77	5	2			1	1	1	1	1
223	1653809	3	meskan	semn shecho	no	4	60809	1	30	1	1	normal svd	1	7	Polyhydraminous	1	0	2500	0	0	2	3	2		5	5	1	0	2	2		6		3		3		2	2	0	4	2			5	2	#NULL!	2	#NULL!
224	934510	3	sodo dachi	gerga tesa	no	4	20510	2	22	1	1	normal svd	1	5	Polyhydraminous+PROM	1	34	2000	8	9	1		2	1	5	25	1	0	1	2		6		2		3		1	1	34	2	1			5	2	#NULL!	1	1
225	217803	3	meskan	debotuto	no	4	90610	2	26	1	2	CS	1	7	Polyhydraminous	1	28.5	1000	0	0	2	3	1		5	5	1	0	1	2		6		1		3		1	1	28	4	2			5	3	#NULL!	1	3
226	924605	3	Meskan	3	butajira	4	210610	2	22	2	1	normal svd	1	6	no	0	0	1500	0	0	2	3	2		5	5	1	0	1	2		6		3		3		2	2	0	5	2			1	1	1	2	#NULL!
227	198808	3	meskan	mechegubo	no	4	250610	2	34	1	1	normal svd	1	5	no	0	0	3500	0	0	2	2	2		5	5	1	0	2	1	4	1		2		2		2	2	0	4	2			5	3	#NULL!	2	#NULL!
228	1575110	3	mareko	koshe01	no	4	220710	2	28	1	1	normal svd	1	5	Inevitable Abortion	0	27.1	600	0	0	2	1	2		5	5	1	0	1	2		6		2		2		3	1	27.1	4	2			5	3	#NULL!	1	1
229	438211	3	sodo	adlechllke	no	4	20311	2	25	1	1	normal svd	1	6	no	0	30.2	1300	0	0	2	1	1		5	5	1	0	1	2		6		4		4		2	1	30.2	4	2			4	1	3	1	2
230	539611	3	sodo	terre 01	Terre	4	110311	2	25	2	4	Episiotomy	1	6	no	0	40	3200	5	6	1		2	1	5	5	1	0	2	1	4	6		3		3		2	2	0	4	2			5	3	#NULL!	2	#NULL!
231	660811	3	meskan	no	no	4	280311	2	25	1	1	normal svd	1	6	no	0	0	3200	8	9	1		2	1	5	5	1	0	2	1	4	6		3		3		2	2	0	5	2			5	3	#NULL!	2	#NULL!
232	619711	3	Meskan	shershera	no	4	300311	2	40	1	1	normal svd	1	6	no	0	0	3200	8	9	1		2	1	5	5	1	0	2	1	4	2		3		3		2	2	0	4	2			5	3	#NULL!	2	#NULL!
233	1084205	3	Meskan	Erimzaf 04	butajira	4	40112	3	28	2	1	normal svd	1	6	no	0	0	3300	0	0	2	2	2		5	5	1	0	2	1	4	1		3		3		2	2	0	4	2			1	1	1	1	1
234	6171	3	meskan	1	enseno	4	140312	3	32	2	1	normal svd	1	6	no	0	0	1200	2	0	2	2	1		5	5	1	0	1	2		6		3		3		2	2	0	5	2			5	3	#NULL!	2	#NULL!
235	343304	3	meskan	wita	no	4	190312	3	33	1	1	normal svd	1	6	no	0	38	3500	0	0	2	1	2		5		1	0	2	2		6		3		3		2	2	0	4	2			5	3	#NULL!	2	#NULL!
236	2696511	3	Meskan	Eresha,03	Butajira	4	50412	3	27	2	1	normal svd	1	6	no	0	32.3	2500	0	0	2	2	1		5	6	1	0	1	1	4	1		5		3		1	1	31.5	2	1			1	1	1	1	3
237	1363812	3	Silti	belowasho	no	4	270612	4	35	1	1	normal svd	1	7	Severe polyhydraminous	2	43	1500	0	0	2	2	2		5	25	1	0	3	3	4	6		2		3		1	1	31.6	4	2			1	1	1	1	2
238	1463512	3	Selti	shelwosho	no	4	50712	4	45	1	1	normal svd	1	7	Severe polyhydraminous	2	33	2000	0	0	2	3	2		5	25	1	0	1	3	4	6		2		3		1	1	33	4	2			5	2	#NULL!	1	1
239	1752909	3	meskan	derema	no	4	100712	4	30	1	1	normal svd	1	6	no	0	38	3600	0	0	2	2	2		5	5	1	0	2	1	4	1		3		3		2	2	0	4	2			3	1	2	2	#NULL!
240	1610912	3	meskan	yetbon	no	4	10812	4	25	1	1	normal svd	1	6	no	0	0	600	0	0	2	3	2		5	5	1	0	4	2		6		6		5	IESO+Midwife	2	2	0	4	2			5	3	#NULL!	2	#NULL!
241	2533110	3	Silti	Jebo sebola	no	4	60812	4	23	1	4	Episiotomy	1	6	no	0	0	2700	7	8	1		2	1	5	5	1	0	2	1	4	2		3		3		2	2	0	4	2			1	1	1	2	#NULL!
242	562103	3	Meskan	3	Butajira	4	240812	4	20	2	1	normal svd	1	6	no	0	0	3600	0	0	2	3	2		5	5	1	0	2	1	4	1		3		3		1	1	27	4	2			3	1	2	1	1
243	2627004	3	meskan	shershera	no	4	150912	4	30	1	1	normal svd	1	6	no	0	42	2800	0	0	2	2	2		5	5	2	2	2	1	4	6	Twin B	3		3		1	1	29.6	4	2			1	1	1	1	1
244	1039011	3	Meskan	Erimzaf,04	Butajira	4	230912	4	26	2	4	Episiotomy	1	6	no	0	40	4400	0	0	2	2	2		5	5	1	0	2	1	4	1		2		3		1	1	34	2	1			1	1	1	1	1
245	683606	3	meskan	s/shershra	no	4	290912	4	35	1	1	Assisted breech delivery	1	7	Severe polyhydraminous	2	0	2500	0	0	2	3	2		5	5	1	0	2	2		6		3		3		2	2	0	4	2			3	1	2	2	#NULL!
246	2716811	3	meskan	bteljano	no	4	231012	4	27	1	1	Assisted breech delivery	1	6	no	0	0	3300	0	0	2	2	1		5	5	1	0	2	1	4	1		4		3		2	2	0	4	2			5	3	#NULL!	1	2
247	2091612	3	meskan	Erinzaf,05	Butajira	4	241112	4	23	2	1	normal svd	1	7	Polyhydraminous	1	0	1200	0	0	2	2	2		5	5	1	0	2	2		6		2		3		1	1	33	4	2			1	1	2	1	2
248	2147512	3	Silti	mektora	no	4	31212	4	18	1	1	normal svd	1	6	no	0	0	1000	0	0	2	3	2		5	15	1	0	1	2		6		3		3		2	2	0	4	2			5	3	#NULL!	2	#NULL!
249	1727407	3	meskan	Ebototo	no	4	151212	4	27	1	1	normal svd	1	6	no	0	0	3500	0	0	2	1	2		5	5	1	0	2	2		6		3		3		1	1	77	4	2			1	1	1	1	2
250	2686911	3	meskan	Elle	no	4	31312	4	20	1	1	normal svd	1	6	no	0	0	600	0	0	2	2	2		5	5	1	0	1	3	4	6		4		4		2	2	0	4	2			5	3	#NULL!	2	#NULL!
251	1039111	3	meskan	Erinzaf,04	butajira	4	10113	4	23	2	1	normal svd	1	6	no	0	38	3300	8	9	1		1	1	5	5	1	0	2	1	4	6		3		3		2	2	0	4	2			1	1	1	1	2
252	2635911	3	meskan	debna bati	no	4	40313	4	22	1	1	normal svd	1	6	no	0	37	2700	7	8	1		1	1	5	5	1	0	2	1	4	2		3		3		2	2	0	4	2			1	1	1	2	#NULL!
253	937805	3	meskan	First geneme	no	4	160313	4	28	1	1	normal svd	1	6	no	0	0	3600	6	8	1		1	1	5	5	1	0	2	1	4	1		3		3		2	2	0	4	2			5	2	#NULL!	2	#NULL!
254	473106	3	meskan	hamer	no	4	170513	5	36	1	1	Assisted breech delivery	1	6	no	0	0	1700	0	0	2	3	2		5	5	1	0	4	1	4	1		3		3		2	2	0	2	1			3	1	2	2	#NULL!
255	1289611	3	meskan	berligna	no	4	40713	5	33	1	1	normal svd	1	6	no	0	32	1000	0	0	2	1	2		5	5	1	0	1	3	4	6		3		3		2	2	0	2	1			5	2	#NULL!	2	#NULL!
256	889313	3	Meskan	erimzafe	Butajira	4	160814	5	27	2	1	normal svd	1	7	Polyhydraminous	1	0	2800	8	9	1		1	2	5	5	1	0	2	3	4	6		3		3		2	2	0	5	2			5	3	#NULL!	2	#NULL!
257	1319708	3	meskan	first geneme	no	4	210913	5	28	1	1	normal svd	1	6	no	0	38	1500	0	0	2	1	2		5	5	1	0	2	2		6		6	Surgery specialist	4		1	1	29.1	2	1			4	1	3	1	3
258	1184009	3	halaba	debasa	no	3	260409	1	24	1	1	Assisted breech delivery	1	6	no	0	0	1200	0	0	2	3	1		5	5	1	0	4	3	4	6		3		3		2	2	0	4	2			3	1	2	2	#NULL!
259	1455708	3	Halaba	dade borwee	no	3	200509	1	30	1	1	normal svd	1	6	no	0	0	1000	0	0	2	1	2		5	5	1	0	4	1	4	1		6	IESO+midwife	5	IESO+Midwife	2	2	0	4	2			5	2	#NULL!	2	#NULL!
260	1522309	3	Halaba	mudamerfa	no	3	260509	1	22	1	1	normal svd	1	6	no	0	0	1800	0	0	2	1	2		5	5	1	0	4	2		6		3		3		2	2	0	4	2			5	3	#NULL!	2	#NULL!
261	1682009	3	halaba	M/gore	no	3	90609	1	28	1	1	normal svd	1	6	no	0	0	1200	0	0	2	2	2		5	5	1	0	4	2		6		3		3		2	2	0	4	2			5	3	#NULL!	2	#NULL!
262	1982309	3	halaba	gurtencho	no	3	60709	1	25	1	1	normal svd	1	6	no	0	0	1500	0	0	2	3	2		5	5	1	0	1	2		6		3		3		2	2	0	4	2			5	2	#NULL!	2	#NULL!
263	1998709	3	halaba	tach arsi	no	3	70709	1	25	1	1	normal svd	1	6	no	0	0	3200	0	0	2	2	2		5	5	1	0	4	2		6		4		4		2	2	0	4	2			3	1	2	2	#NULL!
264	2236309	3	halaba	shwako	no	3	300709	1	18	1	1	normal svd	1	6	no	0	38	1200	0	0	2	3	1		5	5	1	0	2	3	4	6		3		3		2	2	0	4	2			3	2	#NULL!	2	#NULL!
265	242707	3	halaba	zala	no	3	150809	1	20	1	1	normal svd	1	7	Polyhydraminous	1	0	2000	0	0	2	3	2		5	5	1	0	4	2		6		3		3		2	2	0	4	2			5	3	#NULL!	2	#NULL!
266	2226609	3	halaba	zala	no	3	160809	1	30	1	1	normal svd	1	6	no	0	0	1200	0	0	2	2	2		5	5	1	0	4	2		6		3		3		2	2	0	4	2			5	3	#NULL!	2	#NULL!
267	2420409	3	halaba	beneda	no	3	210809	1	30	1	1	normal svd	1	7	Polyhydraminous	1	0	1000	0	0	2	1	1		5	5	1	0	2	2		6		3		3		1	1	77	4	2			3	1	1	1	1
268	2527809	3	halaba	guba	no	3	10909	1	18	1	1	normal svd	1	6	no	0	0	1000	0	0	2	1	2		5	5	1	0	2	2		6		3		3		2	2	0	4	2			3	1	2	2	#NULL!
269	2641709	3	halaba	gubuqa	no	3	120909	1	25	1	1	normal svd	1	7	Polyhydraminous	1	32	1500	0	0	2	1	2		5	5	1	0	2	2		6		3		3		1	1	77	4	2			3	2	#NULL!	2	#NULL!
270	2706809	3	halaba	debosa	no	3	200909	1	25	1	1	normal svd	1	6	no	0	0	900	0	0	2	1	2		5	5	1	0	4	2		6		3		3		2	2	0	4	2			3	1	2	2	#NULL!
271	1619210	3	halaba	dabaso	no	3	250610	2	24	1	1	normal svd	1	7	Polyhydraminous	1	0	1800	0	0	2	1	2		5	5	1	0	1	2		6		4		3		1	1	28	4	2			3	1	2	1	1
272	1628810	3	shashogo	bonosha	bonosha	3	270610	2	24	2	1	normal svd	1	6	no	0	0	3000	0	0	2	1	1		5	5	1	0	2	2	4	6		5		3		1	1	23.2	2	1			5	2	#NULL!	1	3
273	152610	3	shashogo	jamaya	no	3	70810	2	26	1	1	normal svd	1	7	Polyhydraminous	1	0	2000	0	0	2	1	2		5	5	1	0	2	2		6		4		4		3	1	38	2	1			1	1	1	1	1
274	2123410	3	halaba	awrabiso	no	3	220810	2	30	1	1	normal svd	1	6	no	0	0	2500	0	0	2	3	2		5	5	1	0	4	2		6		3		3		2	2	0	4	2			3	1	1	2	#NULL!
275	2187110	3	halaba	tazenda	no	3	110910	2	28	1	1	normal svd	1	6	no	0	0	3600	0	0	2	3	1		5	5	1	0	2	3	4	6		3		3		3	2	0	4	2			5	2	#NULL!	2	#NULL!
276	3469709	3	Shashogo	Bonosha	Bonosha	3	151110	2	20	2	1	normal svd	1	6	no	0	0	2000	0	0	2	1	2		5	5	1	0	2	2		6		6	IESO+midwife	5	IESO+Midwife	2	2	0	4	2			5	3	#NULL!	2	#NULL!
277	2812510	3	halaba	denebe fama	no	3	171110	2	17	1	1	normal svd	1	7	Polyhydraminous	1	0	1000	0	0	2	3	1		5	5	1	0	4	2		6		3		3		2	2	0	4	2			5	3	#NULL!	2	#NULL!
278	2288210	3	halaba	zala	no	3	241110	2	22	1	1	normal svd	1	6	no	0	38	500	0	0	2	2	2		5	5	2	2	2	2		6		3		3		1	1	38	4	2			3	1	2	1	1
279	2943110	3	halaba	hamela	no	3	31210	2	30	1	1	normal svd	1	7	Severe polyhydraminous	2	0	1200	0	0	2	1	2		5	5	1	0	2	2		6		3		3		2	2	0	4	2			3	1	2	2	#NULL!
280	3131110	3	halaba	no	no	3	241210	2	20	1	1	normal svd	1	6	no	0	0	2000	0	0	2	2	1		5	5	1	0	4	2		6		3		3		2	2	0	4	2			5	3	#NULL!	2	#NULL!
281	115711	3	halaba	dala	no	3	210111	2	20	1	1	normal svd	1	6	no	0	0	3500	7	8	1		1	2	5	5	1	0	2	2		6		3		3		2	2	0	4	2			5	3	#NULL!	2	#NULL!
282	229011	3	halaba	no	no	3	240111	2	30	1	1	normal svd	1	6	no	0	0	1000	0	0	2	2	1		5	5	1	0	2	2		6		3		3		2	2	0	4	2			5	3	#NULL!	2	#NULL!
283	662311	3	sankura	kore	no	3	40311	2	25	1	1	normal svd	1	7	Polyhydraminous	1	0	2500	0	0	2	2	1		5	5	1	0	2	2		6		4		4		1	1	31.1	4	2			5	2	#NULL!	1	1
284	861011	3	halaba	awassasu	no	3	230311	2	25	1	1	normal svd	1	6	no	0	0	1600	0	0	2	2	1		5	5	1	0	4	2		6		3		3		2	2	0	4	2			5	3	#NULL!	2	#NULL!
285	2164311	3	halaba	deneb fame	no	3	260311	2	19	1	1	normal svd	1	6	no	0	0	900	0	0	2	1	2		5	5	1	0	1	2		6		4		4		2	2	0	4	2			5	3	#NULL!	2	#NULL!
286	2806910	3	halaba	le/bere	halaba	3	30411	2	20	1	1	normal svd	1	6	no	0	38.6	3000	8	9	1		1	1	5	5	1	0	2	1	4	6		3		3		1	1	37.2	4	2			1	1	2	1	1
287	820511	3	halaba	keytesu	no	3	130411	2	25	1	2	CS	1	6	no	0	39.05	2400	8	9	1		1	1	5	5	2	2	2	1	4	6		6	IESO+midwife	5	IESO+Midwife	1	1	36.1	2	1			5	2	#NULL!	1	1
288	99812	3	halaba	denebe fama	no	3	290312	2	22	1	3	Forceps	1	6	no	0	0	3400	4	5	1		2	1	5	5	1	0	2	1	4	6		4		4		1	1	24	4	2			5	3	#NULL!	1	1
289	2131407	3	halaba	zala	no	3	130912	4	20	1	1	normal svd	1	6	no	0	0	1500	0	0	2	1	2		5	5	1	0	1	1	4	1		3		3		2	2	0	4	2			3	1	2	2	#NULL!
290	1758009	3	Arbaminch	lante	no	10	170609	1	25	1	1	normal svd	1	6	no	0	40	3500	0	0	2	1	2		5	5	1	0	2	2		6		2		2		2	2	0	2	1			3	1	2	1	1
291	2232509	3	arbaminch	1	arbaminch	10	110809	1	24	2	1	normal svd	1	6	no	0	0	1500	0	0	2	3	2		5	5	1	0	1	2		6		2		3		2	2	0	5	2			5	3	#NULL!	2	#NULL!
292	1472106	3	abaya	abaya	no	10	281109	1	18	1	1	normal svd	1	6	no	0	0	1200	0	0	2	3	1		5	5	1	0	4	2		6		3		3		2	2	0	4	2			5	1	2	1	1
293	131509	3	Lante	lante	no	10	170109	1	28	2	1	normal svd	1	6	no	0	0	2500	7	10	1		1	1	5	5	1	0	2	1	4	6		3		3		2	2	0	4	2			5	3	#NULL!	1	1
294	603309	3	Arbaminch	2	arbaminch	10	20309	1	28	2	1	normal svd	1	6	no	0	0	1000	0	0	2	3	1		5	6	1	0	4	3	4	6		4		4		2	2	0	4	2			1	1	1	1	1
295	904509	3	Arbaminch	w/melke	Arbaminch	10	160509	1	18	2	1	normal svd	1	6	no	0	0	800	0	0	2	1	2		5	5	1	0	4	2		6		3		3		1	1	25	2	1			1	1	1	1	1
296	1598310	3	Arbaminch	1	Arbaminch	10	70610	2	23	2	1	normal svd	1	6	no	0	0	1100	0	0	2	3	2		5	5	1	0	4	2		6		6	Midwife+Medical Intern	5	Medical Intern	1	1	30.6	2	1			1	1	1	1	1
297	1766906	3	Arbaminch	3	Arbaminch	10	90610	2	20	2	1	normal svd	1	6	no	0	39	2700	4	3	1		1	1	5	5	1	0	2	1	4	6		4		4		2	2	0	4	2			3	1	2	1	1
298	450209	3	Arbaminch	secha	Arbaminch	10	300610	2	32	2	1	normal svd	1	8	PROM	0	35	1500	0	0	2	2	2		5	5	1	0	1	2		6		6	Midwife+Medical Intern	5	Midwife+Medical Intern	1	1	37.2	4	2			1	1	1	1	1
299	1863210	3	Bonke	1	no	10	10710	2	22	1	1	normal svd	1	6	no	0	0	1500	6	7	1		1	1	5	5	1	0	4	1	4	6		3		3		2	2	0	4	2			3	1	2	2	#NULL!
300	3483510	3	Mehrab Abaya	Birbir	no	10	91210	2	28	1	1	normal svd	1	8	PROM	0	35.3	2700	0	0	2	2	2		5	5	1	0	1	2		6		3		3		2	2	0	2	1			3	1	2	2	#NULL!
301	338611	3	Kamba	Slakaro	no	10	110211	2	25	1	1	normal svd	1	6	no	0	34	3000	0	0	2	2	1		5	5	1	0	1	2		6		2		2		1	1	26	4	2			3	1	1	1	1
302	2022312	1	Negele borona	1	Negele	1	31312	4	30	2	1	normal svd	1	7	Polyhydraminous	1	42	1300	0	0	2	2	2		5	5	1	0	2	2		6		2		2		1	1	33.6	2	1			3	1	2	1	1
303	180013	3	worabe	1	worabe	5	20613	5	25	2	1	normal svd	1	6	no	0	39	2800	5	6	1		1	1	4	5	1	0	2	1	3	6		3		3		2	2	0	4	2			1	1	1	1	1
304	1403911	3	Selti	danecho	no	5	151013	5	35	1	2	CS	1	6	no	0	38	2500	4	6	1		1	1	5	45	1	0	2	2		6		3		3		2	2	0	4	2			3	1	2	1	1
305	2281112	3	selti	geten	no	5	220612	4	23	1	1	normal svd	1	6	no	0	38	1800	7	6	1		2	1	5	45	1	0	2	2		6		1		3		1	1	28	2	1			3	1	2	1	1
306	293310	3	lanfuro	wante bedete	no	5	140210	1	20	1	1	normal svd	1	6	no	0	36	1800	0	0	2	1	1		5	5	1	0	1	2		6		3		3		2	2	0	1	1			3	1	2	1	1
307	2921712	3	Dalocha	no	no	5	241012	4	25	1	1	normal svd	1	1	no	0	38	2900	2	4	1		1	1	5	45	1	0	2	2		2		3		3		2	2	0	2	1			3	1	2	1	1
308	2548410	3	kucha	no	no	5	290610	2	20	1	1	normal svd	1	6	no	0	0	1500	0	0	2	2	2		5	5	1	0	1	1	3	6		6	Midwife+Medical Intern	5	Midwife+Medical Intern	2	2	0	2	1			3	2	#NULL!	2	#NULL!
309	4484109	3	Sodo zuria	no	no	10	241009	1	27	1	1	normal svd	1	6	no	0	38	1800	0	0	2	2	2		5	5	1	0	2	3	4	6		4		4		1	2	0	4	2			3	1	2	1	1
310	2648109	1	west arsi	1	dodola	1	120609	1	25	2	1	normal svd	1	6	no	0	37	2200	6	7	1		2	1	5	25	1	0	2	1	4	6		5		5	Midwife+Medical Intern	1	1	37	2	1			3	1	2	1	1
311	2683009	1	shashemene	2	shashemene	1	120609	1	32	2	1	normal svd	1	6	no	0	41	2000	0	0	2	3	2		5	5	1	0	2	2		6		6	Midwife+Medical Intern	5	Midwife+Medical Intern	1	1	28	4	2			4	1	3	1	2
312	4485710	1	wondogenet	no	wondo	1	300210	1	30	2	3	Vacuum	1	6	no	0	0	2400	0	0	2	1	2		5	5	1	0	2	2		6		3		3		2	2	0	2	1			3	1	2	1	1
313	4758810	1	West Arsi	1	Negele	1	200610	2	38	2	1	normal svd	1	3	no	0	0	2100	0	0	2	1	2		5	5	1	0	2	2		6		6	Midwife+Medical Intern	5	Midwife+Medical Intern	2	2	0	4	2			3	1	2	1	2
314	3202411	1	Hawassa	Tabor	Hawassa	1	30711	2	32	2	1	normal svd	1	6	no	0	38	2000	0	0	2	1	2		5	5	1	0	2	2		6		3		3		1	1	24	4	2			3	1	2	1	3
315	18013	1	shashemene	no	shashemene	1	10113	4	18	2	1	normal svd	1	6	no	0	40	2100	7	9	1		1	1	5	5	1	0	2	1	4	6		2		3		1	1	28	4	2			3	1	3	1	3
316	3436412	1	Wondogenet	1	wondogenet	1	200713	5	27	2	1	normal svd	1	6	no	0	0	2300	6	7	1		2	1	5	45	1	0	2	1	4	6		2		5	Midwife+Medical Intern	2	2	0	2	1			3	1	2	1	1
317	298124	3	Analemo	am bale	no	12	170613	5	33	1	1	normal svd	1	6	no	0	0	1200	0	0	2	1	2		5	5	1	0	1	2		6		3		3		2	2	0	4	2			3	1	2	1	1
318	2048010	3	Malle	no	no	8	271110	2	24	1	1	normal svd	1	6	no	0	0	1200	0	0	2	1	2		5	5	1	0	4	2		6		3		3		2	2	0	4	2			3	1	2	1	1
319	1289712	3	Konso	mazilala	no	9	80612	4	25	1	1	normal svd	1	6	no	0	0	2500	0	0	2	1	2		5	5	1	0	4	2		6		3		3		2	2	0	4	2			3	1	2	2	#NULL!
320	1896212	3	konso	soyama	no	9	290912	4	27	1	1	normal svd	1	6	no	0	0	1500	0	0	2	1	2		5	5	1	2	2	2		6		4		4		2	2	0	4	2			3	1	2	1	1
[truncated: 35 more columns]
