# Supplementary material for: The burden of neural tube defects in Southern Ethiopia: trends, hotspots, and public health implications
Source: PeerJ. 2026 Feb 17;14:e20447. doi: 10.7717/peerj.20447 (PMC12922585; doi:10.7717/peerj.20447)
Supplement: Supplemental Information 5 [file peerj-14-20447-s005.xlsx]

## Sheet: 5 yrs NTDs
	Hospital Name	Total NTDs	2017				2018				2019				2020				2021				5 Yrs Total
			NTD	LB	SB	TB	NTD	LB	SB	TB	NTD	LB	SB	TB	NTD	LB	SB	TB	NTD	LB	SB	TB	LB	SB	TB
	Hawassa University Comprehensive Specialized Hospital	25	8	4455	295	4758	3	3236	262	3503	6	3688	187	3881	4	3502	167	3674	4	3871	186	4057	18752	1097	19873
	Yirgalem General Hospital	2	1	2850	125	2900	0	2970	127	3034	0	2670	138	2805	0	2709	128	2747	1	2805	105	2837	14004	623	14323
	Halaba Kulito General Hospital	70	13	1031	72	1103	17	2407	115	2488	17	2672	112	2785	11	2844	111	2975	12	4026	149	4093	12980	559	13444
	Butajira General Hospital	68	12	3279	27	3351	11	3643	84	3727	12	3927	86	4015	21	4549	97	4646	12	4906	116	5026	20304	410	20765
	Worabe Comprehensive Specialized Hospital	30	7	1335	49	1384	2	1269	25	1294	3	1301	48	1349	8	1400	61	1461	10	1391	54	1445	6696	237	6933
	Mizan-Tepi University Teaching Hospital	27	7	2423	132	2563	9	2657	95	2762	4	2688	120	2618	5	2980	145	3139	2	3556	176	3732	14304	668	14814
	Gebretsdik Shawo Memorial General Hospital	8	0	1648	86	1708	0	2112	87	2168	3	2376	106	2297	1	2441	96	2377	4	2622	107	2635	11199	482	11185
	Jinka General Hospital	23	7	2264	119	2379	3	1589	107	1696	4	3849	120	3969	6	2697	121	2818	3	2359	104	2463	12758	571	13325
	Karat	15	0	985	15	1010	0	1800	25	1836	3	2076	37	2130	11	2054	78	2149	1	2268	43	2311	9183	198	9436
	Arbaminch General Hospital	27	6	2770	114	2884	7	3467	92	3559	3	3052	131	3183	5	2922	64	2986	6	3803	109	3912	16014	510	16524
	Wolita Sodo University CSH	16	3	2378	100	2478	5	5364	132	5496	1	5583	148	5729	3	4830	132	4958	4	6053	110	6139	24208	622	24800
	Wachemo University NEMMCSH	9	0	4299	161	4460	0	4821	189	5010	0	7935	204	8139	6	7126	212	7344	3	8811	164	8978	32992	930	33931
	Total	320	64	29717	1295	30978	57	35335	1340	36573	56	41817	1437	42900	81	40054	1412	41274	62	46471	1423	47628	193394	6907	199353

## Sheet: Total LB and SB
	Hospital	Total births	Total NTDs	NTDs per 10,000births	LB	SB
1	Hawassa University CSH	19873	25	12.5799	18752	1097
2	Yirgalem GH	14323	2	1.39636	14004	623
3	Halaba Kulito GH	13444	70	52.0678	12980	559
4	Butajira GH	20765	68	32.7474	20304	410
5	Worabe CSH	6933	30	43.2713	6696	237
6	Mizan-Tepi University TH	14814	27	18.226	14304	668
7	Gebretsdik Shawo Memorial GH	11185	8	7.15244	11199	482
8	Jinka GH	13325	23	17.2608	12758	571
9	Konso Karat PH	9436	15	15.8966	9183	198
10	Arbaminch GH	16524	27	16.3399	16014	510
11	Wolita Sodo University CSH	24800	16	6.45161	24208	622
12	Wachemo University N/E/M/M CSH	33931	9	2.65244	32992	930
	Total	199353	320	16.0519	193394	6907

## Sheet: Mantel-Henzel OR
Year	LB	SB	TB	Total NTDs	NTDs per 10,000birth	Proportion	Mantel -Henzel summary Odds Ratio
2017	29717	1295	30978	64	20.6598	0.206598	1
2018	35335	1340	36573	57	15.5853	0.155853	0.75
2019	41817	1437	42900	56	13.0536	0.130536	0.63
2020	40054	1412	41274	81	19.6249	0.196249	0.95
2021	46471	1423	47628	62	13.0176	0.130176	0.63
Total	193394	6907	199353	320	16.0519	0.160519

## Sheet: Burden NTDs
Regions	Hospitals	5 years			Total NTDs		95 % CI per 10,000 births
		LB	SB	TB		NTDs per 10,000births	Lower	Upper
Sidama	Hawassa University CSH	18752	1097	19873	25	12.6	8.14	18.57
	Yirgalem GH	14004	623	14323	2	1.4	0.17	5.04
	Sum	32756	1720	34196	27	7.9	5.2	11.49
Central Ethiopia	Halaba Kulito GH	12980	559	13444	70	52.1	40.61	65.4
	Butajira GH	20304	410	20765	68	32.7	25.44	41.5
	Worabe CSH	6696	237	6933	30	43.3	29.21	61.72
	Wachemo University NEMMCSH	32992	930	33931	9	2.7	1.21	5.04
	Sum	72972	2136	75073	177	23.6	20.24	27.31
South western Peoples	Mizan-Tepi University TH	14304	668	14814	27	18.2	12.01	26.51
	Gebretsdik Shawo Memorial GH	11199	482	11185	8	7.2	3.09	14.09
	Sum	25503	1150	25999	35	13.5	9.38	18.72
South Ethiopia	Jinka GH	12758	571	13325	23	3.6	10.95	25.89
	Karat PH	9183	198	9436	15	15.9	8.9	26.21
	Arbaminch GH	16014	510	16524	27	16.3	10.77	23.77
	Wolita Sodo University CSH	24208	622	24800	16	6.5	3.69	10.48
	sum	62163	1901	64085	81	12.6	10.04	15.71
	Total	193394	6907	199353	320	16.1	14.34	17.91
